# Supplementary material for: Predicting analysis times in randomized clinical trials with cancer immunotherapy
Source: PubMed Central journal article supplement (PMC4736164; doi:10.1186/s12874-016-0117-3), 2016-02-01
Supplement: 12874_2016_117_MOESM1_ESM.pdf [file 12874_2016_117_MOESM1_ESM.pdf]

## Additional file 1

Since cured patients will not experience the event of interest, this leads to  $\lim_{t \rightarrow \infty} S(t|Y = 1, \mathbf{z}) = 1$ . It follows that

$$F(t|\boldsymbol{\theta}, \mathbf{x}, \mathbf{z}) = 1 - S(t|\boldsymbol{\theta}, \mathbf{x}, \mathbf{z}) = [1 - \pi(\mathbf{x})]F(t|Y = 0, \boldsymbol{\theta}, \mathbf{z})$$

The likelihood can be expressed as

$$\mathcal{L}(\boldsymbol{\theta}) = \prod_{i=1}^{N(\tau)} \{[1 - \pi_i(\mathbf{x})]f(t_i|Y = 0, \boldsymbol{\theta}, \mathbf{z})\}^{\delta_i(\tau)} \{\pi_i(\mathbf{x}) + [1 - \pi_i(\mathbf{x})]S(t_i|Y = 0, \boldsymbol{\theta}, \mathbf{z})\}^{1 - \delta_i(\tau)},$$

and the log-likelihood is given by

$$\begin{aligned} \ell(\boldsymbol{\theta}) &= \sum_{i=1}^{N(\tau)} \delta_i(\tau) \log\{[1 - \pi_i(\mathbf{x})]f(t_i|Y = 0, \boldsymbol{\theta}, \mathbf{z})\} \\ &\quad + \sum_{i=1}^{N(\tau)} [1 - \delta_i(\tau)] \log\{\pi_i(\mathbf{x}) + [1 - \pi_i(\mathbf{x})]S(t_i|Y = 0, \boldsymbol{\theta}, \mathbf{z})\}, \end{aligned}$$

where  $X_i(\tau)$  and  $\delta_i(\tau)$  represent the observed event time and censoring status at time  $\tau$ .

The maximum likelihood estimates  $(\hat{\pi}, \hat{\boldsymbol{\theta}})$  can be obtained via algorithms, such as Newton-Raphson Ridge or Trust-Region Optimization method.
