# Supplementary material for: Predicting analysis times in randomized clinical trials with cancer immunotherapy
Source: PubMed Central journal article supplement (PMC4736164; doi:10.1186/s12874-016-0117-3), 2016-02-01
Supplement: 12874_2016_117_MOESM2_ESM.pdf [file 12874_2016_117_MOESM2_ESM.pdf]

## Additional file 2

Commonly used conditional latency survival distribution and parametric mixture cure rate models

|             | $S(t Y = 0)^*$                                             | $S(t)^\dagger = \pi + (1 - \pi)S(t Y = 0)$                          | $h(t)^\ddagger$                                                                                                                                                     |
|-------------|------------------------------------------------------------|---------------------------------------------------------------------|---------------------------------------------------------------------------------------------------------------------------------------------------------------------|
| Exponential | $e^{-\theta_1 t}$                                          | $\pi + (1 - \pi)e^{-\theta_1 t}$                                    | $\frac{\theta_1(1 - \pi)e^{-\theta_1 t}}{\pi + (1 - \pi)e^{-\theta_1 t}}$                                                                                           |
| Weibull     | $e^{-(\theta_1 t)^{\theta_2}}$                             | $\pi + (1 - \pi)e^{-(\theta_1 t)^{\theta_2}}$                       | $\frac{\theta_1 \theta_2 (\theta_1 t)^{\theta_2 - 1} (1 - \pi) e^{-(\theta_1 t)^{\theta_2}}}{\pi + (1 - \pi) e^{-(\theta_1 t)^{\theta_2}}}$                         |
| Lognormal   | $1 - \Phi\left(\frac{\log(t) - \theta_1}{\theta_2}\right)$ | $1 - (1 - \pi)\Phi\left(\frac{\log(t) - \theta_1}{\theta_2}\right)$ | $\frac{\frac{(1 - \pi)}{t\theta_2} \phi\left(\frac{\log(t) - \theta_1}{\theta_2}\right)}{1 - (1 - \pi)\Phi\left(\frac{\log(t) - \theta_1}{\theta_2}\right)}$        |
| Loglogistic | $\frac{1}{1 + (\theta_1 t)^{\theta_2}}$                    | $\pi + \frac{(1 - \pi)}{1 + (\theta_1 t)^{\theta_2}}$               | $\frac{(1 - \pi)\theta_1 \theta_2 (\theta_1 t)^{\theta_2 - 1}}{[1 + (\theta_1 t)^{\theta_2}]^2 \left[ \pi + \frac{(1 - \pi)}{1 + (\theta_1 t)^{\theta_2}} \right]}$ |

\* Survival function for the population subject to event of interest;

† Survival function for the entire population;

‡ Hazard function for the entire population.
